# Supplementary material
Source: publisher figshare collection journal article supplement (https://tandf.figshare.com/ndownloader/files/17773433)
Supplement: Supplementary file 1 [file 17773433]

**Appendix:**

**Lists of experimental stimuli used in Experiment 1 and 2**

**List 1: 1st conjugation regular**

| **infinitive form** |  | **past-participle form** |
| --- | --- | --- |
| 1. appoggiare | *(to lean)* | appoggiato |
| 1. aspettare | *(to wait for)* | aspettato |
| 1. colare | *(to drip)* | colato |
| 1. compilare | *(to fill out)* | compilato |
| 1. comprovare | *(to prove)* | comprovato |
| 1. curare | *(to take care of)* | curato |
| 1. disattivare | *(to deactivate)* | disattivato |
| 1. incontrare | *(to meet)* | incontrato |
| 1. maltrattare | *(to mistreat)* | maltrattato |
| 1. migliorare | *(to improve)* | migliorato |
| 1. operare | *(to operate)* | operato |
| 1. perdonare | *(to forgive)* | perdonato |
| 1. pregare | *(to pray)* | pregato |
| 1. preparare | *(to prepare)* | preparato |
| 1. protestare | *(to protest)* | protestato |
| 1. riattivare | *(to reactivate)* | riattivato |
| 1. ricercare | *(to research)* | ricercato |
| 1. ricomprare | *(to buy again)* | ricomprato |
| 1. ricreare | *(to recreate)* | ricreato |
| 1. rigettare | *(to reject)* | rigettato |
| 1. rincuorare | *(to encourage)* | rincuorato |
| 1. rinnegare | *(to repudiate)* | rinnegato |
| 1. ritrovare | *(to find)* | ritrovato |
| 1. salvare | *(to save)* | salvato |
| 1. scavare | *(to dig)* | scavato |
| 1. sognare | *(to dream)* | sognato |
| 1. spiegare | *(to explain)* | spiegato |
| 1. verificare | *(to verify)* | verificato |

**List 2: 1st conjugation regular-bis**

| **infinitive form** |  | **past-participle form** |
| --- | --- | --- |
| 1. abbandonare | *(to abandon)* | abbandonato |
| 1. accennare | *(to outline)* | accennato |
| 1. complicare | *(to complicate)* | complicato |
| 1. comprare | *(to buy)* | comprato |
| 1. condannare | *(to condemn)* | condannato |
| 1. confermare | *(to confirm)* | confermato |
| 1. dominare | *(to dominate)* | dominato |
| 1. indicare | *(to indicate)* | indicato |
| 1. malmenare | *(to manhandle)* | malmenato |
| 1. mandare | *(to send)* | mandato |
| 1. occupare | *(to occupy)* | occupato |
| 1. passare | *(to pass through)* | passato |
| 1. praticare | *(to exercise)* | praticato |
| 1. preoccupare | *(to worry)* | preoccupato |
| 1. provocare | *(to provoke)* | provocato |
| 1. rassicurare | *(to reassure)* | rassicurato |
| 1. riavviare | *(to restart)* | riavviato |
| 1. richiamare | *(to call back)* | richiamato |
| 1. riciclare | *(to recycle)* | riciclare |
| 1. ridare | *(to give back)* | ridato |
| 1. rientrare | *(to go back)* | rientrato |
| 1. risanare | *(to heal)* | risanato |
| 1. ritornare | *(to return)* | ritornato |
| 1. scaricare | *(to download)* | scaricato |
| 1. scatenare | *(to set off)* | scatenato |
| 1. sollevare | *(to raise)* | sollevato |
| 1. sparare | *(to shoot)* | sparato |
| 1. volare | *(to fly)* | volato |

**List 3: 2nd conjugation regular**

| **infinitive form** |  | **past-participle form** |
| --- | --- | --- |
| 1. appartenere | *(to belong to)* | appartenuto |
| 1. attenere | *(to conform to)* | attenuto |
| 1. combattere | *(to fight)* | combattuto |
| 1. compiacere | *(to gratify)* | compiaciuto |
| 1. contenere | *(to contain)* | contenuto |
| 1. controbattere | *(to counterattack)* | controbattuto |
| 1. dispiacere | *(to regret)* | dispiaciuto |
| 1. intessere | *(to weave)* | intessuto |
| 1. mantenere | *(to maintain)* | mantenuto |
| 1. mietere | *(to harvest)* | mietuto |
| 1. ottenere | *(to obtain)* | ottenuto |
| 1. piacere | *(to like)* | piaciuto |
| 1. piovere | *(to rain)* | piovuto |
| 1. precedere | *(to precede)* | preceduto |
| 1. premere | *(to press)* | premuto |
| 1. ribattere | *(to beat again)* | ribattuto |
| 1. ricevere | *(to receive)* | ricevuto |
| 1. ricredere | *(to change idea)* | ricreduto |
| 1. riottenere | *(to obtain again)* | riottenuto |
| 1. ripetere | *(to repeat)* | ripetuto |
| 1. ritenere | *(to believe)* | ritenuto |
| 1. rivendere | *(to resell)* | rivenduto |
| 1. sbattere | *(to beat)* | sbattuto |
| 1. scadere | *(to expire)* | scaduto |
| 1. sfottere | *(to tease)* | sfottuto |
| 1. sostenere | *(to support)* | sostenuto |
| 1. svendere | *(to sell out)* | svenduto |
| 1. vendere | *(to sell)* | venduto |

**List 4: 2nd conjugation irregular**

| **infinitive form** |  | **past-participle form** |
| --- | --- | --- |
| 1. apprendere | *(to learn)* | appreso |
| 1. attendere | *(to wait for)* | atteso |
| 1. comprimere | *(to compress)* | compresso |
| 1. concorrere | *(to compete)* | concorso |
| 1. consistere | *(to consist of)* | consistito |
| 1. contorcere | *(to twist)* | contorto |
| 1. dirigere | *(to direct)* | diretto |
| 1. insistere | *(to insist)* | insistito |
| 1. mordere | *(to bite)* | morso |
| 1. muovere | *(to move)* | mosso |
| 1. offendere | *(to offend)* | offeso |
| 1. percorrere | *(to travel)* | percorso |
| 1. prescegliere | *(to select)* | prescelto |
| 1. prescrivere | *(to prescribe)* | prescritto |
| 1. prevalere | *(to prevail)* | prevalso |
| 1. redigere | *(to draft)* | redatto |
| 1. riassumere | *(to summarise)* | riassunto |
| 1. richiedere | *(to ask)* | richiesto |
| 1. richiudere | *(to close)* | richiuso |
| 1. rimanere | *(to remain)* | rimasto |
| 1. rinascere | *(to be reborn)* | rinato |
| 1. rincorrere | *(to chase)* | rincorso |
| 1. riscrivere | *(to rewrite)* | riscritto |
| 1. scuotere | *(to shake)* | scosso |
| 1. soffriggere | *(to fry)* | soffritto |
| 1. sommergere | *(to submerge)* | sommerso |
| 1. svolgere | *(to unroll)* | svolto |
| 1. vivere | *(to live)* | vissuto |

**List 5: 3rd conjugation regular**

| **infinitive form** |  | **past-participle form** |
| --- | --- | --- |
| 1. agire | *(to act)* | agito |
| 1. colpire | *(to hit)* | colpito |
| 1. compatire | *(to pity)* | compatito |
| 1. consentire | *(to permit)* | consentito |
| 1. costituire | *(to constitute)* | costituito |
| 1. definire | *(to define)* | definito |
| 1. eseguire | *(to carry out)* | eseguito |
| 1. investire | *(to invest)* | investito |
| 1. marcire | *(to rot)* | marcito |
| 1. mentire | *(to lie)* | mentito |
| 1. obbedire | *(to obey)* | obbedito |
| 1. perseguire | *(to pursue)* | perseguito |
| 1. preferire | *(to prefer)* | preferito |
| 1. presagire | *(to predict)* | presagito |
| 1. proseguire | *(to continue)* | proseguito |
| 1. reagire | *(to react)* | reagito |
| 1. riferire | *(to report)* | riferito |
| 1. rifinire | *(to complete)* | rifinito |
| 1. ringiovanire | *(to rejuvenate)* | ringiovanito |
| 1. ripartire | *(to leave again)* | ripartito |
| 1. riunire | *(to gather)* | riunito |
| 1. rivestire | *(to encase)* | rivestito |
| 1. seguire | *(to follow)* | seguito |
| 1. sopperire | *(to provide for)* | sopperito |
| 1. sparire | *(to disappear)* | sparito |
| 1. stabilire | *(to establish)* | stabilito |
| 1. svanire | *(to vanish)* | svanito |
| 1. vestire | *(to dress)* | vestito |

**List 5: 3rd conjugation irregular**

| **infinitive form** |  | **past-participle form** |
| --- | --- | --- |
| 1. apparire | *(to appear)* | apparso |
| 1. aprire | *(to open)* | aperto |
| 1. comparire | *(to come into view)* | comparso |
| 1. contraddire | *(to contradict)* | contraddetto |
| 1. convenire | *(to suit)* | convenuto |
| 1. coprire | *(to cover)* | coperto |
| 1. disdire | *(to cancel)* | disdetto |
| 1. intervenire | *(to intervene)* | intervenuto |
| 1. maledire | *(to damn)* | maledetto |
| 1. morire | *(to die)* | morto |
| 1. offrire | *(to offer)* | offerto |
| 1. pervenire | *(to reach)* | pervenuto |
| 1. predire | *(to predict)* | predetto |
| 1. prevenire | *(to prevent)* | prevenuto |
| 1. provenire | *(to come from)* | provenuto |
| 1. riapparire | *(to reappear)* | riapparso |
| 1. riaprire | *(to reopen)* | riaperto |
| 1. ricomparire | *(to reappear)* | ricomparso |
| 1. ricoprire | *(to re-cover)* | ricoperto |
| 1. ridire | *(to repeat)* | ridetto |
| 1. rinvenire | *(to recover your senses)* | rinvenuto |
| 1. riscoprire | *(to rediscover)* | riscoperto |
| 1. scomparire | *(to disappear)* | scomparso |
| 1. scoprire | *(to find out)* | scoperto |
| 1. soffrire | *(to suffer)* | sofferto |
| 1. sovvenire | *(to come to mind)* | sovvenuto |
| 1. svenire | *(to faint)* | svenuto |
| 1. venire | *(to come)* | venuto |
